# Supplementary material for: A microfluidic co-culture model for investigating colonocytes–microbiota interactions in colorectal cancer
Source: Royal Society of Chemistry journal article supplement (doi:10.1039/d4lc00013g), 2024-01-01
Supplement: d4lc00013g1.pdf [file d4lc00013g1.pdf]

## A microfluidic co-culture model for investigating colonocytes-microbiota interactions in colorectal cancer

Daniel Penarete-Acosta<sup>1</sup>, Rachel Stading<sup>2</sup>, Laura Emerson<sup>1</sup>, Mitchell Horn<sup>2</sup>, Sanjukta Chakraborty<sup>3</sup>, Arum Han<sup>1,2,4</sup>, Arul Jayaraman<sup>1,2\*</sup>

<sup>1</sup> Department of Biomedical Engineering, Texas A&M University

<sup>2</sup> Artie McFerrin Department of Chemical Engineering, Texas A&M University

<sup>3</sup> Department of Medical Physiology, College of Medicine, Texas A&M University

<sup>4</sup> Department of Electrical and Computer Engineering, Texas A&M University

\*Corresponding author. arulj@tamu.edu

### Supplementary material

Supplementary Table 1 Primer sequences for qRT-PCR analysis.

| Gene           | Forward Primer Sequence  | Reverse Primer Sequence  |
|----------------|--------------------------|--------------------------|
| APC            | TTGGCTCGATGCTGTTCCCA     | AGCCCAGGGAGGCGTACATA     |
| CA IX          | GTTACCTCAGCACCGCCTT      | GCACTGTTTTCTTCCGGGCC     |
| E-cad          | ACGTACAAGGGTCAGGTGCC     | TGGGGTATTGGGGGCATCAG     |
| Fibronectin    | ACAACACCGAGGTGACTGAGAC   | GGACACAACGATGCTTCCTGAG   |
| Gli            | ACAGAAGGACTGTCTGGCCC     | CAGTGCCCGCTTCTTGGTCA     |
| GLUT-1         | TACCGCCAGCCCATCCTCAT     | CCTGCTCGCTCCACCACAAA     |
| IL-18          | GTGTTCAAGACCAGCCTGACCAAC | TAGCTGGGATTGAGGGCATGCG   |
| IL-8           | TGGACCACACTGCGCCAACA     | TCTCCACAACCCTCTGCACCCA   |
| Ki-67          | TGTCACCACCCACAGCCACC     | GTTGTTCCCTGCCACCGTGCC    |
| KRAS           | CCAGGCCCTGTGTGAACCTT     | ACACTGGATGACCGTGGGGA     |
| myc            | ACAACACCCGAGCAAGGACG     | GCAGCTGCAAGGAGAGCCTT     |
| p16            | AGTTACGGTCGGAGGCCGAT     | CCACCAGCGTGTCCAGGAAG     |
| PIK3CA         | AGCGTTTCTGCTTTGGGACAA    | CTGATGATGGTCGTGGAGGCA    |
| PTCHD1         | TGAGACTGACCACGGCCTG      | ACCCTCAGTTGGAGCTGCTTG    |
| PTEN           | AACGATGGCTGTGGTTGCCA     | GCACAGTTCACCCCTTCCA      |
| SMAD4          | TCGACAGATGCAGCAGCAGG     | GGATGTTTCTGCCACGGCT      |
| SNAI2          | TCCATTCCACGCCAGCTAC      | GGACTCACTCGCCCCAAAGA     |
| SNAI1          | ACTATGCCGCGCTCTTTCCT     | CGTAGGGCTGCTGGAAGGTA     |
| TGF- $\beta$ 1 | GAGTTGTGCGGCAGTGGTTGAG   | ACCCGTTGATGTCCACTTGCAGT  |
| TNF- $\alpha$  | GCCCAGGCAGTCAGATCATC     | CTCTGATGGCACCACCAGCT     |
| TWIST          | GCGGCCAGGTACATCGACTT     | GCTGCAGCTTGCCATCTTGG     |
| UBC            | GCCGGGATTTGGGTCGCAG      | CACGAAGATCTGCATTGTCAAGTG |
| VEGFA          | GCGACAGGGGCAAAGTGAGT     | GACTGGTCAGCTGCGGGATC     |
| Vimentin       | TGCGCCTCCGGGAGAAATTG     | ACGTGCCAGAGACGCATTGT     |
| ZEB1           | AGCGCTTCTCACACTCTGGG     | TGCTGTCACGTTCTTCCGCT     |
